# Supplementary material for: Hydrothermal synthesis of carbon quantum dots with size tunabilityviaheterogeneous nucleation
Source: Royal Society of Chemistry journal article supplement (doi:10.1039/d2ra05989d), 2022-01-01
Supplement: d2ra05989d1.pdf [file d2ra05989d1.pdf]

Supplementary Information for

## Hydrothermal synthesis of carbon quantum dots with size tunability via heterogeneous nucleation

Nant Nammahachak <sup>a</sup>, Kamonwan Khamphumee Aup-Ngoen <sup>b,\*</sup>, Piyapong Asanithi <sup>c</sup>, Mati Horpratum <sup>d</sup>, Surawut Chuangchote <sup>a,e</sup>, Sutatch Ratanaphan <sup>a,f,g,\*</sup>, and Werasak Surareungchai <sup>f</sup>

<sup>a</sup> Department of Tool and Materials Engineering, King Mongkut's University of Technology Thonburi, 126 Prachauthit Road, Bangmod, Bangkok 10140, Thailand

<sup>b</sup> Materials and Nondestructive Testing Laboratory, King Mongkut's University of Technology Thonburi (KMUTT, Ratchaburi), 126 Pracha Uthit Rd., Thung Khru, Bangkok 10140, Thailand

<sup>c</sup> Department of Physics, Faculty of Science, King Mongkut's University of Technology Thonburi, 126 Prachauthit Road, Bangmod, Bangkok 10140, Thailand

<sup>d</sup> Opto-Electrochemical Sensing Research Team (OEC), National Electronic and Computer Technology Center, 112 Thailand Science Park, Pahonyothin Rd., Khlong Nueng, Khlong Luang, Pathum Thani 12120, Thailand

<sup>e</sup> Research Center of Advanced Materials for Energy and Environmental Technology (MEET), King Mongkut's University of Technology Thonburi, 126 Prachauthit Road, Bangmod, Bangkok 10140, Thailand

<sup>f</sup> Nanoscience and Nanotechnology Graduate Program, King Mongkut's University of Technology Thonburi, 126 Prachauthit Road, Bangmod, Bangkok 10140, Thailand

<sup>g</sup> Center of Excellence in Theoretical and Computational Science Center (TaCS-CoE), King Mongkut's University of Technology Thonburi, 126 Pracha Uthit Rd, Thung Khru, Bangkok 10140, Thailand

\*Corresponding authors:

E-mail: kamonwan.aup@kmutt.ac.th (K. K. Aup-Ngoen) and sutatch.ratanaphan@mail.kmutt.ac.th (S. Ratanaphan)

**Table S1.** Summary of average sizes, intensity ratios between D and G bands, ( $I_D/I_G$ ), and fluorescence quantum yields (QYs) of the CQDs prepared with different filling volumes (20%, 50%, and 80%). The mean sizes (Mean) and standard deviations (SD) are obtained from the size distributions of CQDs in Fig. 1.

**Fig. S1** TEM images and their size distributions of the CQDs prepared with the filling volumes of (a) 20%, (b) 50%, and (c) 80% colored with black, blue, and red, respectively. Note that three levels of brightness (dark, medium, and light) are used to describe the size distributions determined from the first (left), second (middle), and third (right) experiments of the hydrothermal syntheses, respectively. For comprehensive comparisons, the cumulative size distributions obtained from these three sets of experiments with the different filling volumes are shown in (d).

**Fig. S2** Photographs of the CQDs under ambient light and ultraviolet lamp (a). Excitation-dependent fluorescence (FL) emission spectra of the CQDs synthesized by using filling volumes of 20% (b), 50% (c), and 80% (d), respectively.

**Table S1.** Summary of average sizes, intensity ratios between D and G bands, ( $I_D/I_G$ ), and fluorescence quantum yields (QYs) of the CQDs prepared with different filling volumes (20%, 50%, and 80%). The mean sizes (Mean) and standard deviations (SD) are obtained from the size distributions of CQDs in Fig. 1.

| <b>Filling volume<br/>(%)</b> | <b>CQD size<br/>(Mean± SD nm)</b> | <b><math>I_D/I_G</math></b> | <b>QYs of CQDs</b> |
|-------------------------------|-----------------------------------|-----------------------------|--------------------|
| 20                            | 15 ±1.4                           | 0.75                        | 8.0 %              |
| 50                            | 13 ± 1.6                          | 0.67                        | 10.8 %             |
| 80                            | 4 ± 1                             | 0.63                        | 11.0 %             |

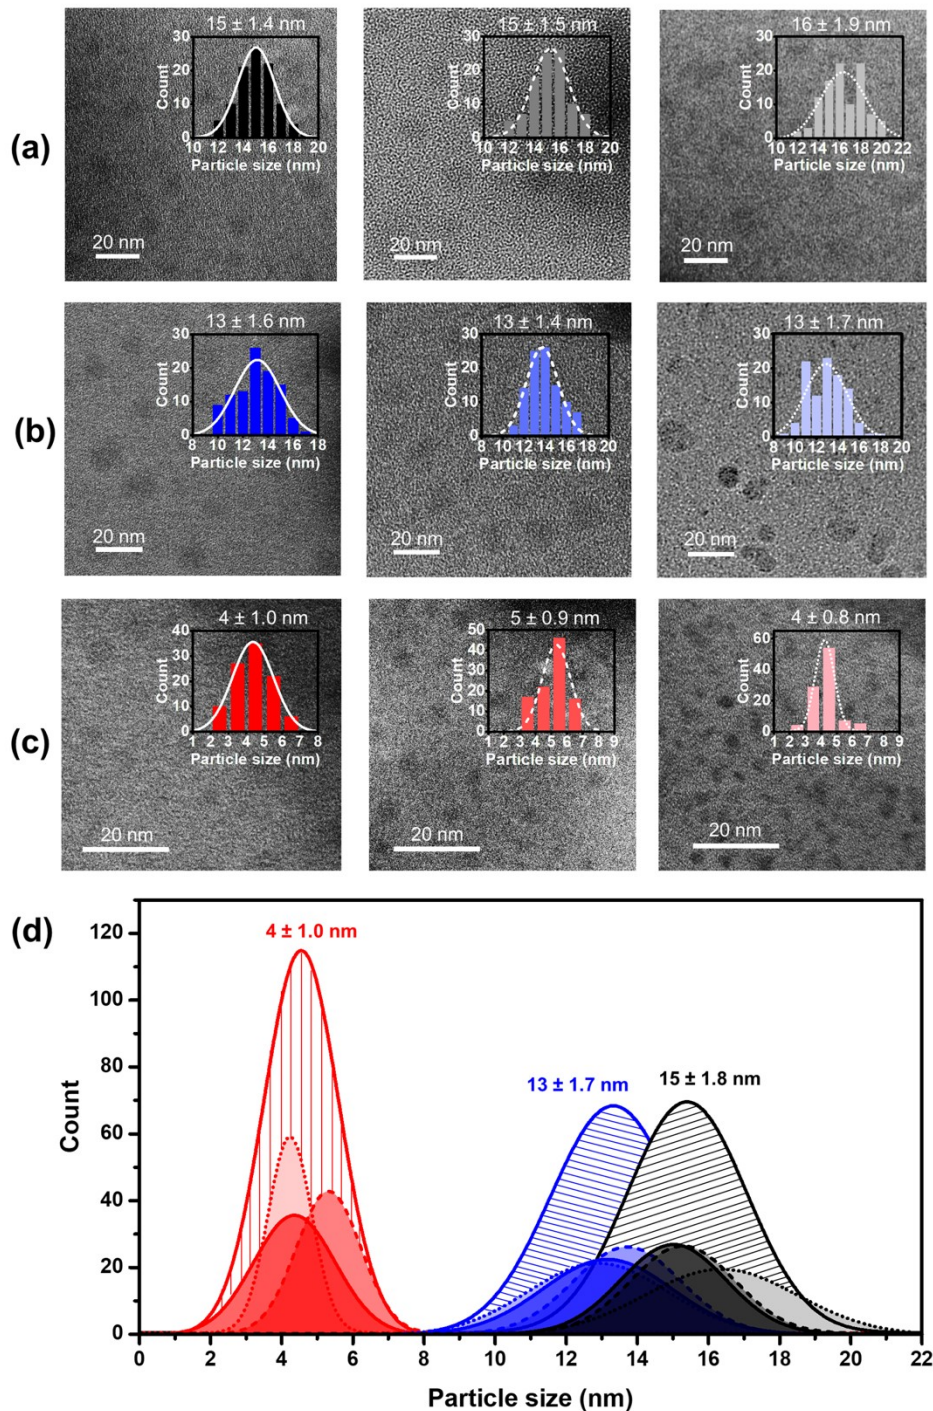

**Fig. S1** TEM images and their size distributions of the CQDs prepared with the filling volumes of (a) 20%, (b) 50%, and (c) 80% colored with black, blue, and red, respectively. Note that three levels of brightness (dark, medium, and light) are used to describe the size distributions determined from the first (left), second (middle), and third (right) experiments of the hydrothermal syntheses, respectively. For comprehensive comparisons, the cumulative size distributions obtained from these three sets of experiments with the different filling volumes are shown in (d).

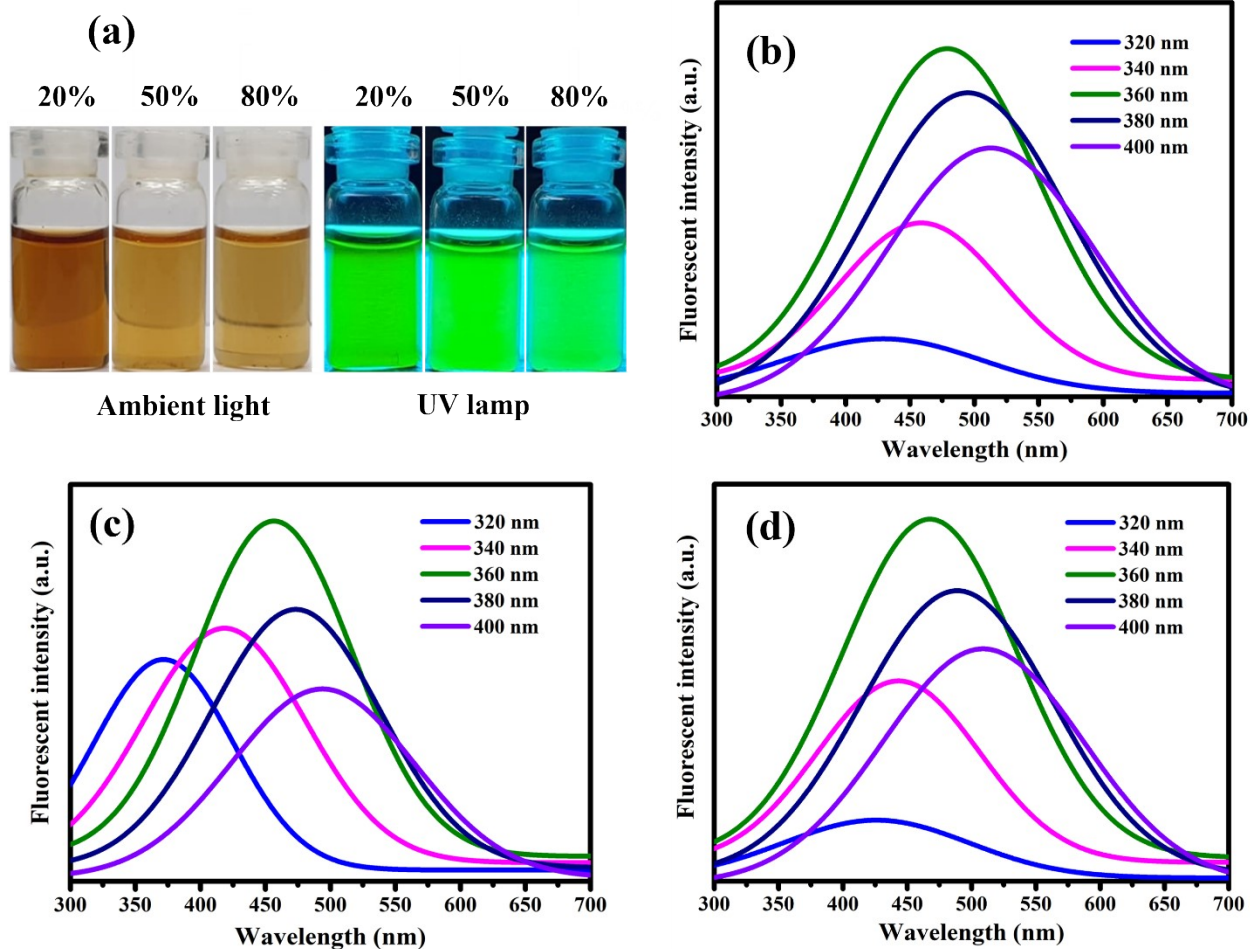

**Fig. S2** Photographs of the CQDs under ambient light and ultraviolet lamp (a). Excitation-dependent fluorescence (FL) emission spectra of the CQDs synthesized by using filling volumes of 20% (b), 50% (c), and 80% (d), respectively.
